# Supplementary material for: Curling and rolling dynamics of naturally curved ribbons
Source: Royal Society of Chemistry journal article supplement (doi:10.1039/c3sm52142g), 2014-01-01
Supplement: c3sm52142g.pdf [file c3sm52142g.pdf]

## Supplemental Videos

**S1:** Movie (3000fps) of curling dynamics of a ribbon with  $TSN=7.5$  (PVC200,  $a_0 = 0.6$  cm,  $W = 0.3$  cm).

**S2:** Movie (3000fps) of curling dynamics of a ribbon with  $TSN=2100$  (PVC200,  $a_0 = 0.6$  cm,  $W = 5$  cm).

**S3:** Movie (10000fps) of curling dynamics without solid substrate interaction. Upper sequence: ribbon with small  $TSN$  (PVC100,  $W = 0.4$  cm,  $a_0 = 0.6$  cm); down: ribbon with large  $TSN$  (PVC100,  $W = 3.5$  cm,  $a_0 = 0.6$  cm).

**S4:** Movie (100 fps) showing a specific frustrated curling dynamics when the natural radius of the ribbon is 0.32 times its elastogravitational length  $L_g$  (PP90,  $W = 3.5$  cm,  $a_0 = 4.0$  cm).

**S5:** Movie (100fps) of curling dynamics of a ribbon in water (PVC100,  $a_0 = 1.25$  cm).

**S6:** Movie (100fps) of curling dynamics of a ribbon in water (PVC100,  $a_0 = 0.5$  cm).
